# Supplementary material for: Development of Phage Lysin LysA2 for Use in Improved Purity Assays for Live Biotherapeutic Products
Source: PubMed Central journal article supplement (PMC4690888; doi:10.3390/v7122965), 2015-12-16
Supplement: viruses-07-02965-s001.pdf [file viruses-07-02965-s001.pdf]

# Supplementary Materials: Development of Phage Lysin LysA2 for Use in Improved Purity Assays for Live Biotherapeutic Products

Sheila M. Dreher-Lesnack, Jeremy E. Schreier and Scott Stibitz

Accession #AJ251789

GAATTCCTTTAAGAAGGAGATATACCATGTCCTACACCATCAATAAAGAATTTGCCCTGGGCGCT  
AATGAAGGCTCGTCACAAGTTGCTAACCGTCTGTATATCATCCTGCATGATGTTGGTGCAGAAAG  
CGGTGCACGTGCTAACGCAGCATACTTCAAAAACAACATCTCTGCGGAAATCGCCTACACGGCA  
TTCGTGGTTGGTATGGCGGTCAGGTTTATCAAGTCGGTGAACCGGGTTACGTGCAGTGGGGTGC  
AGGTACCGTTGCAAACGCCAATTCACCGGTCCAAATTGAACTGGGTCATACGTCCGGATCCGGAA  
ACCTTTAAAAAAGACTATGCGGTCTACATTGAACTGGCCCGTGATATGGCAGCTCGCTATGGCAT  
CCCGACGTCACCTGGACGCTGGCGGTGCAGGTACCCCGGGTATTAATCGCACCTGTGGGTGACG  
CAGCATATCTGGGGTGATCACACCGACCCGTATGGTTACCTGGCGCGTTGGGGCATCACGAAAG  
AAAACTGGCAGCAGATCTGGCAAACGGTACCACGACCGTTGACGCCAGCACCTCTGCACCGGC  
TACGCAGAGTACCCGTCCGCAAGCAACGGTCTCCGGTAACGTGAATGCTACCTATGGCCTGCATC  
TGCTGGGCGGTAGCTGGCTGGATGAAGTGACCAACTTTGGCTCTGGTGACAATGGCTTCGCGGGT  
ATGCCGAATCATCAGCAGATCTGCTGTATATTCGTGTTGACCATGGTAGTGTCAAATACCGCGT  
GCACACCGTTCAATCCGGTTGGCTGGATTGGGTGACGAAAGGCGATCGCAACGACACCGTTAAT  
GGCTGCGCCGGTATTGCAGGCGAAGCTATCGATGGTGTGCAGATTATCTTCTGACCCCGGCAGG  
CGAACCGTATCAGCAAGCTTATTACCGTTCACAGACGACCCAACGTGCAGGTTGGCTGGGTGTCG  
TGTGTGATGACGGCACCTCCCTGCCGAGTATACGGGTACCTACGCAGGCCTGTTTGGTGAACCG  
CTGGACCGTCTGCAAATCGGCATCTCGTCAATCAACCCGTTTTAAATCTAGA

Accession #NP\_680500

MSYTINKEFALGANEGSSQVANRLYIILHDVGAESGARANAAYFKNNISAEIAYTAFVVGDDGGQVYQV  
GEPGYVQWGAGTVANANSPVQIELGHTSDPETFKDYAVYIELARDMAARYGIPTSLDAGGAGTPGIK  
SHLWVTQHIWGDHTDPYGYLARWGITKEKLAADLANGTTTVDASTAPATQSTRPQATVSGNVNAT  
YGLHLLGGSWLDEVTFNGSGDNGFAGMPNHQHDLLYIRVDHGSVKYRVHTVQSGWLDWVTKGDRN  
DTVNGCAGIAGEAIDGVQIIFLTPAGEPYQQAYYRSQTTQRAGWLGVVCDGTSPLPQYTGTYAGLFG  
PLDRLQIGISSINPF

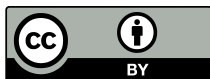

© 2015 by the authors; licensee MDPI, Basel, Switzerland. This article is an open access article distributed under the terms and conditions of the Creative Commons by Attribution (CC-BY) license (<http://creativecommons.org/licenses/by/4.0/>).
